# Supplementary material for: How well are hazards associated with derechos reproduced in regional climate simulations?
Source: Copernicus journal article supplement (doi:10.5194/nhess-24-4473-2024), 2024-12-10
Supplement: Supplementary file 1 [file nhess-24-4473-2024-supplement.pdf]

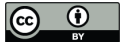

*Supplement of*

## **How well are hazards associated with derechos reproduced in regional climate simulations?**

**Tristan Shepherd et al.**

*Correspondence to:* Tristan Shepherd (tshepnzl@gmail.com) and Sara C. Pryor (sp2279@cornell.edu)

The copyright of individual parts of the supplement might differ from the article licence.

1 Supplemental Materials

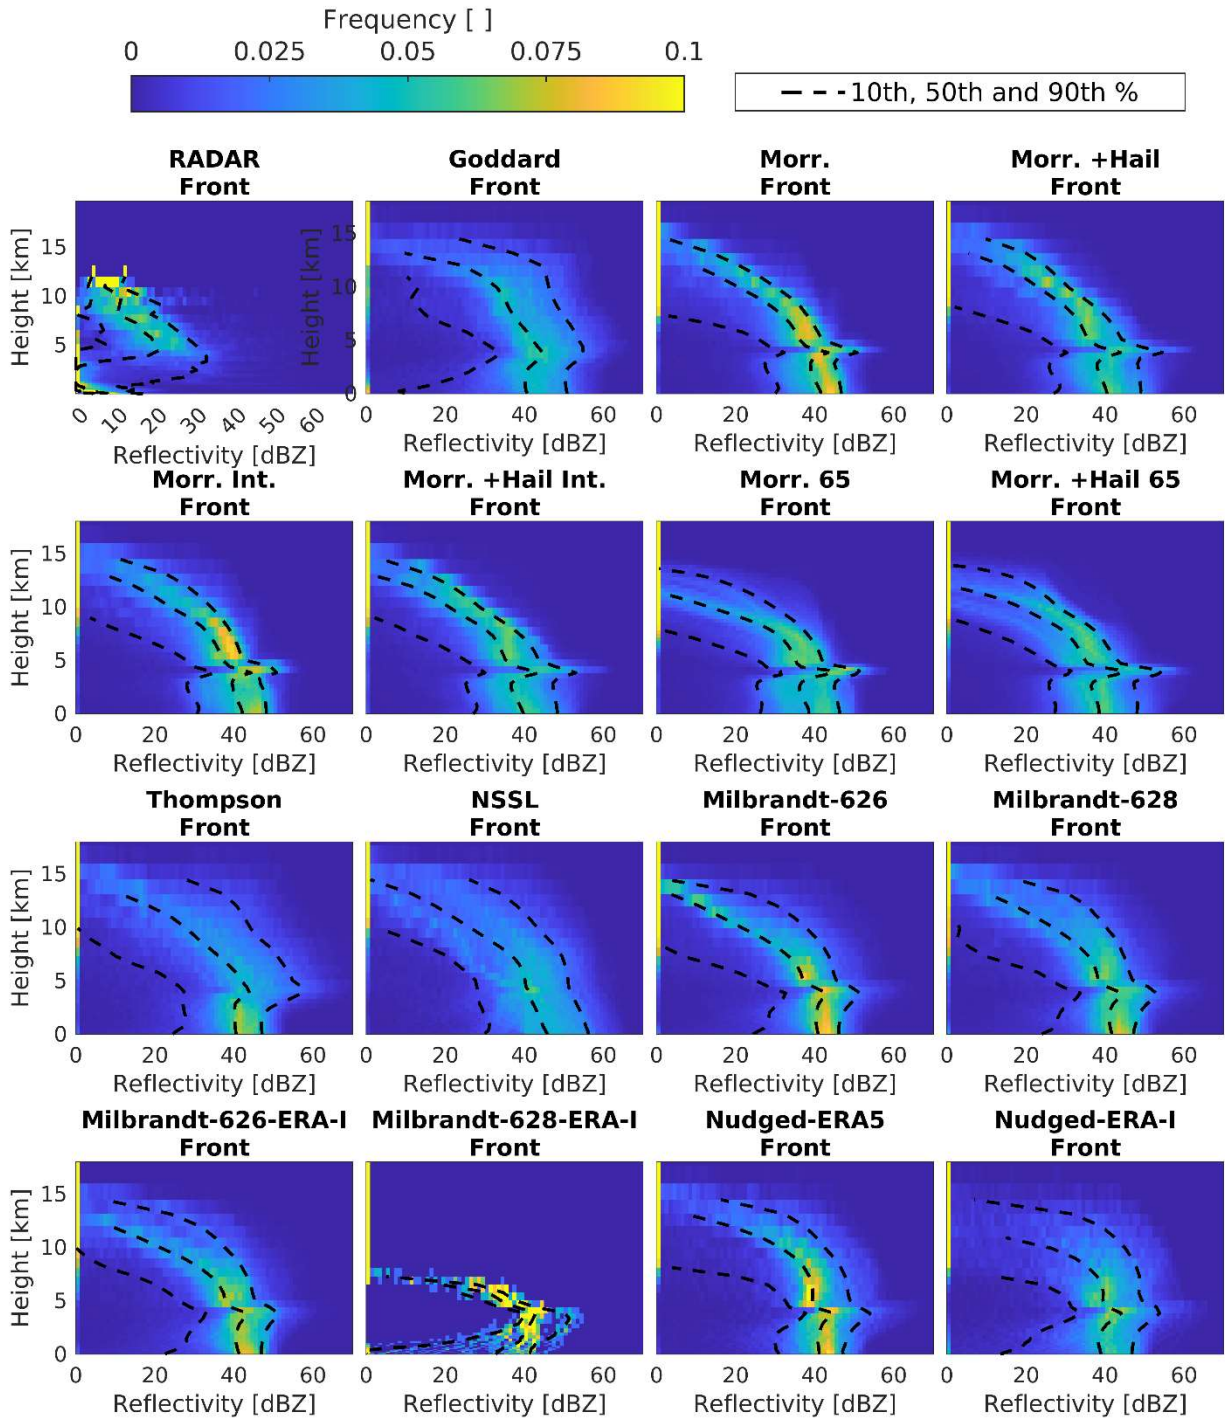

2

3 **Figure S1: Probability distributions of base reflectivity from RADAR and derived RADAR reflectivity from each WRF**  
 4 **ensemble member at each model height at  $t_p$  during the Front period. The plot shows the frequency with which a given**  
 5 **reflectivity is observed at a given height in output for all domain d03 grid cells where  $cREF > 40$  dBZ. Dotted lines show**  
 6 **the 10<sup>th</sup>, 50<sup>th</sup> and 90<sup>th</sup> percentile reflectivity at each height.**

7

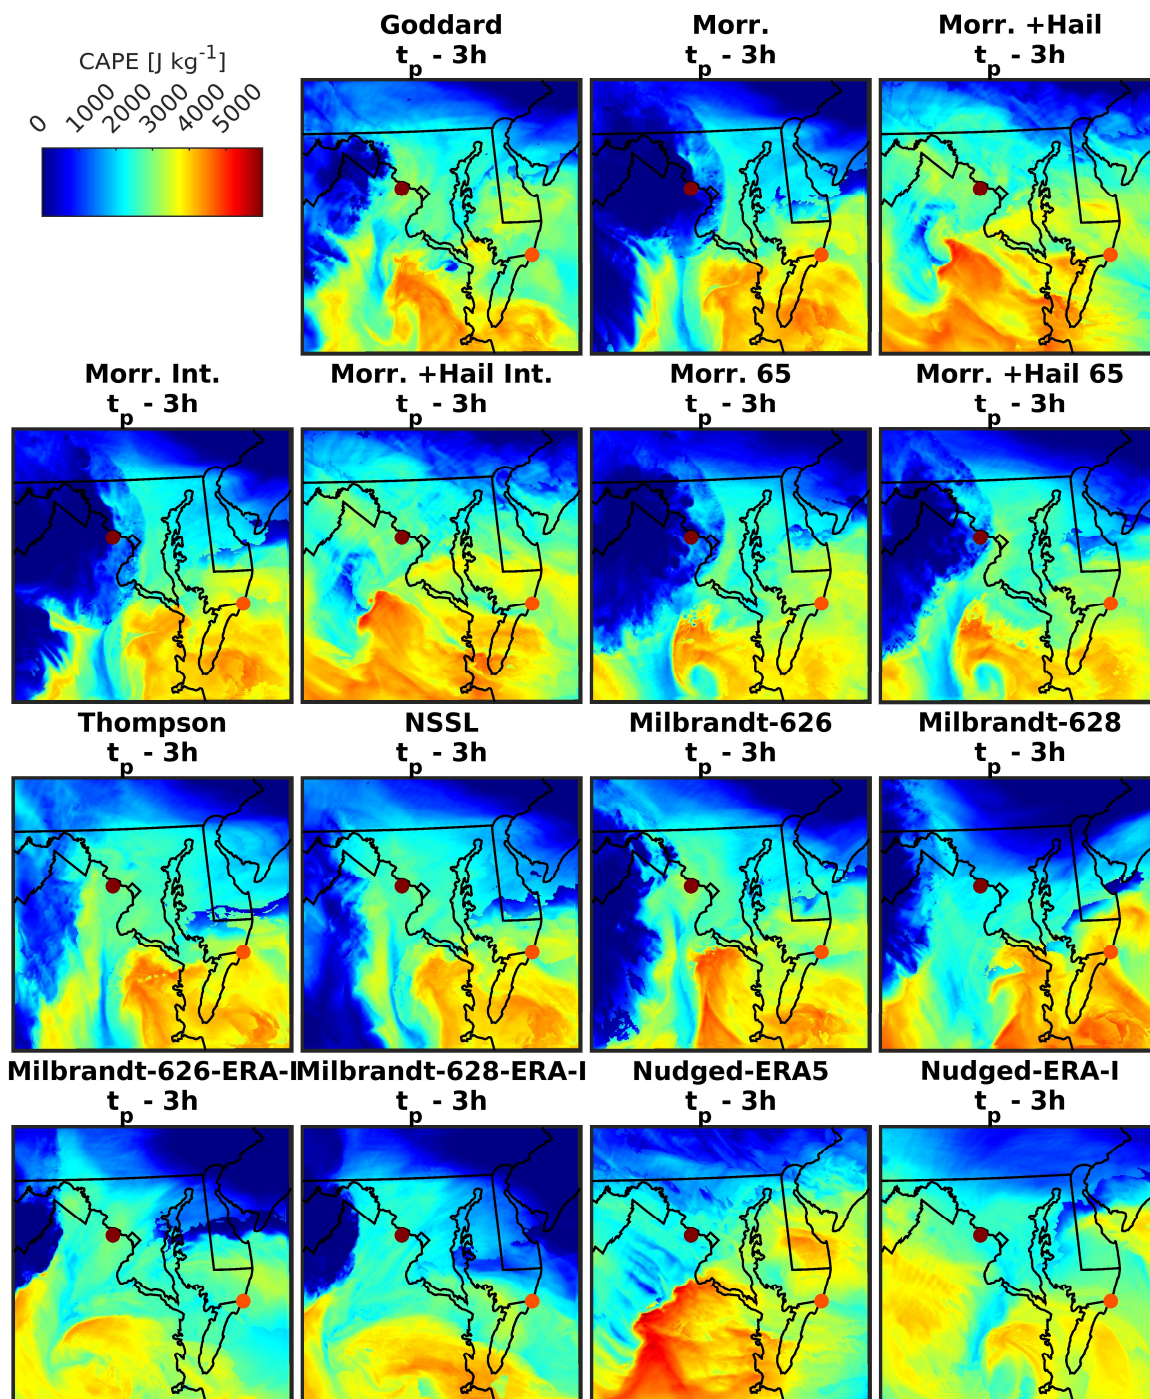

8  
 9 Figure S2: Spatial patterns of MU-CAPE at  $t_p-3$  (i.e. 3 hours prior to the time of peak spatial extent of cREF > 40 dBZ  
 10 during the Derecho period) over domain d03 for all ensemble members. These panels are also shown in Figure 13 of the  
 11 main text but are included again here, enlarged for visibility. MU-CAPE as computed from the SHARPPy program based  
 12 on rawinsonde data at  $t_p-3$  (define from RADAR) (i.e. 0000 UTC 30 June) at KIAD (38.968N, -77.369E) and KVAL  
 13 (38.018N and -75.236E) are shown by the filled circles.



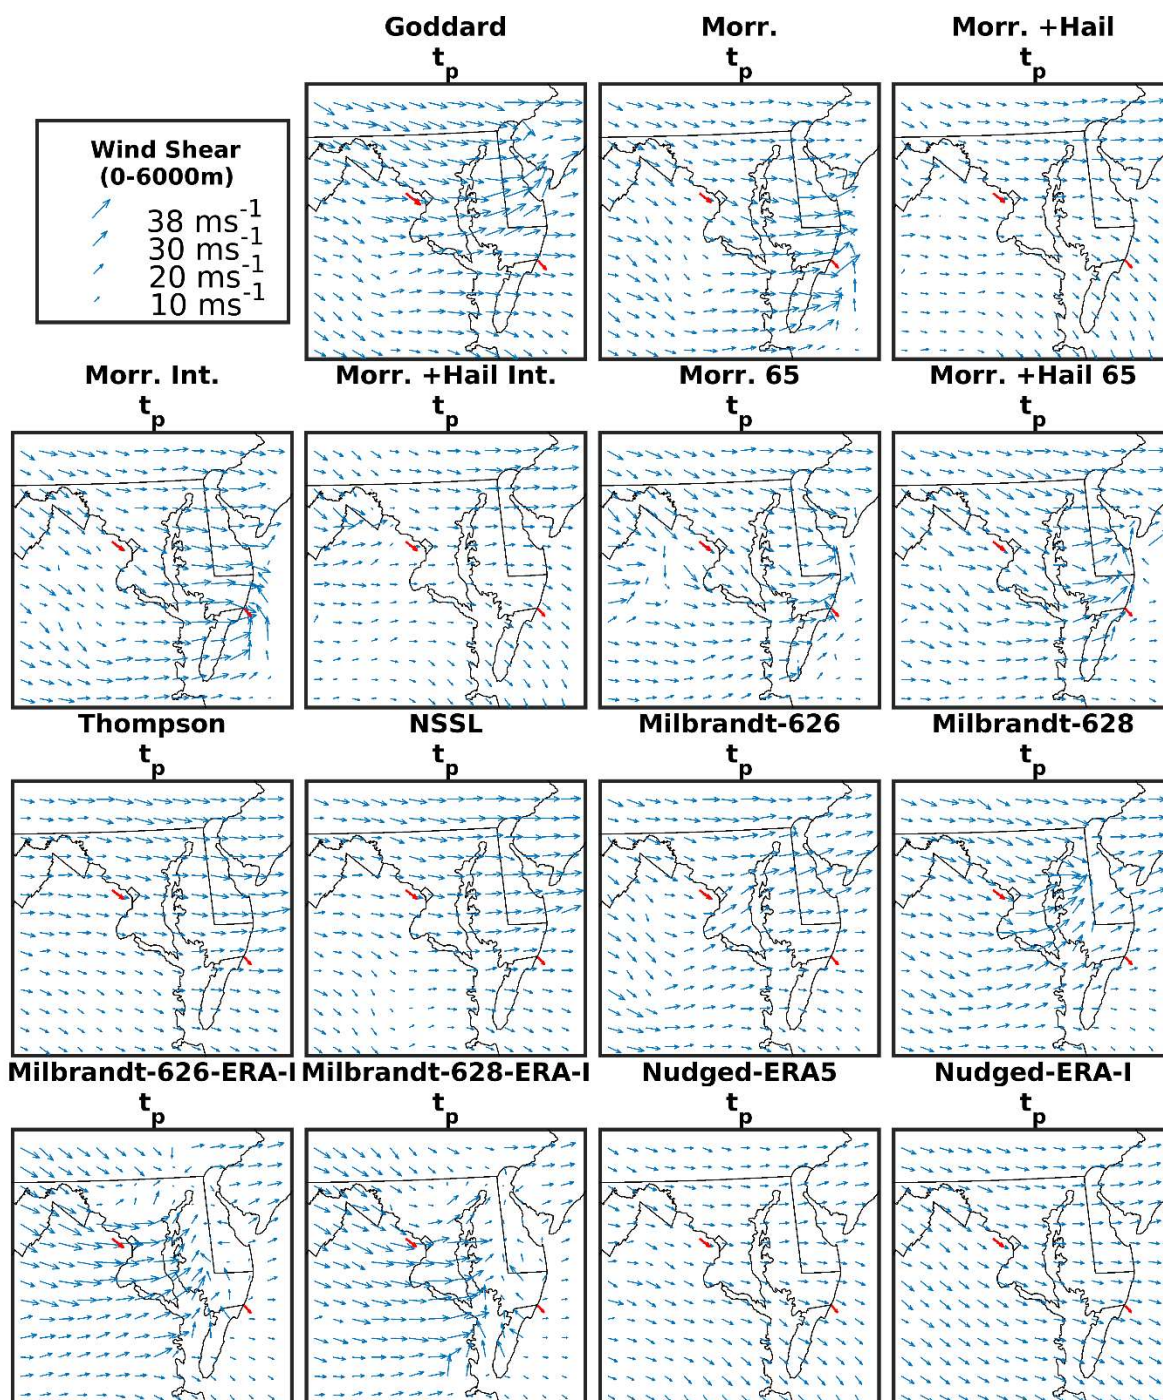

14

15 Figure S3: Total wind shear between the ground and 6000 m (S6, see definition in section 2.3) at  $t_p$  (the time of peak spatial  
 16 extent of cREF > 40 dBZ during the Derecho period) for each ensemble member. These panels are also shown in Figure 13  
 17 of the main text but are included again here, enlarged for visibility. Observed shear from the surface to 6 km at the KIAD  
 18 (38.968N, -77.369E) and KVAL (38.018N and -75.236E) stations are shown by the red arrows.



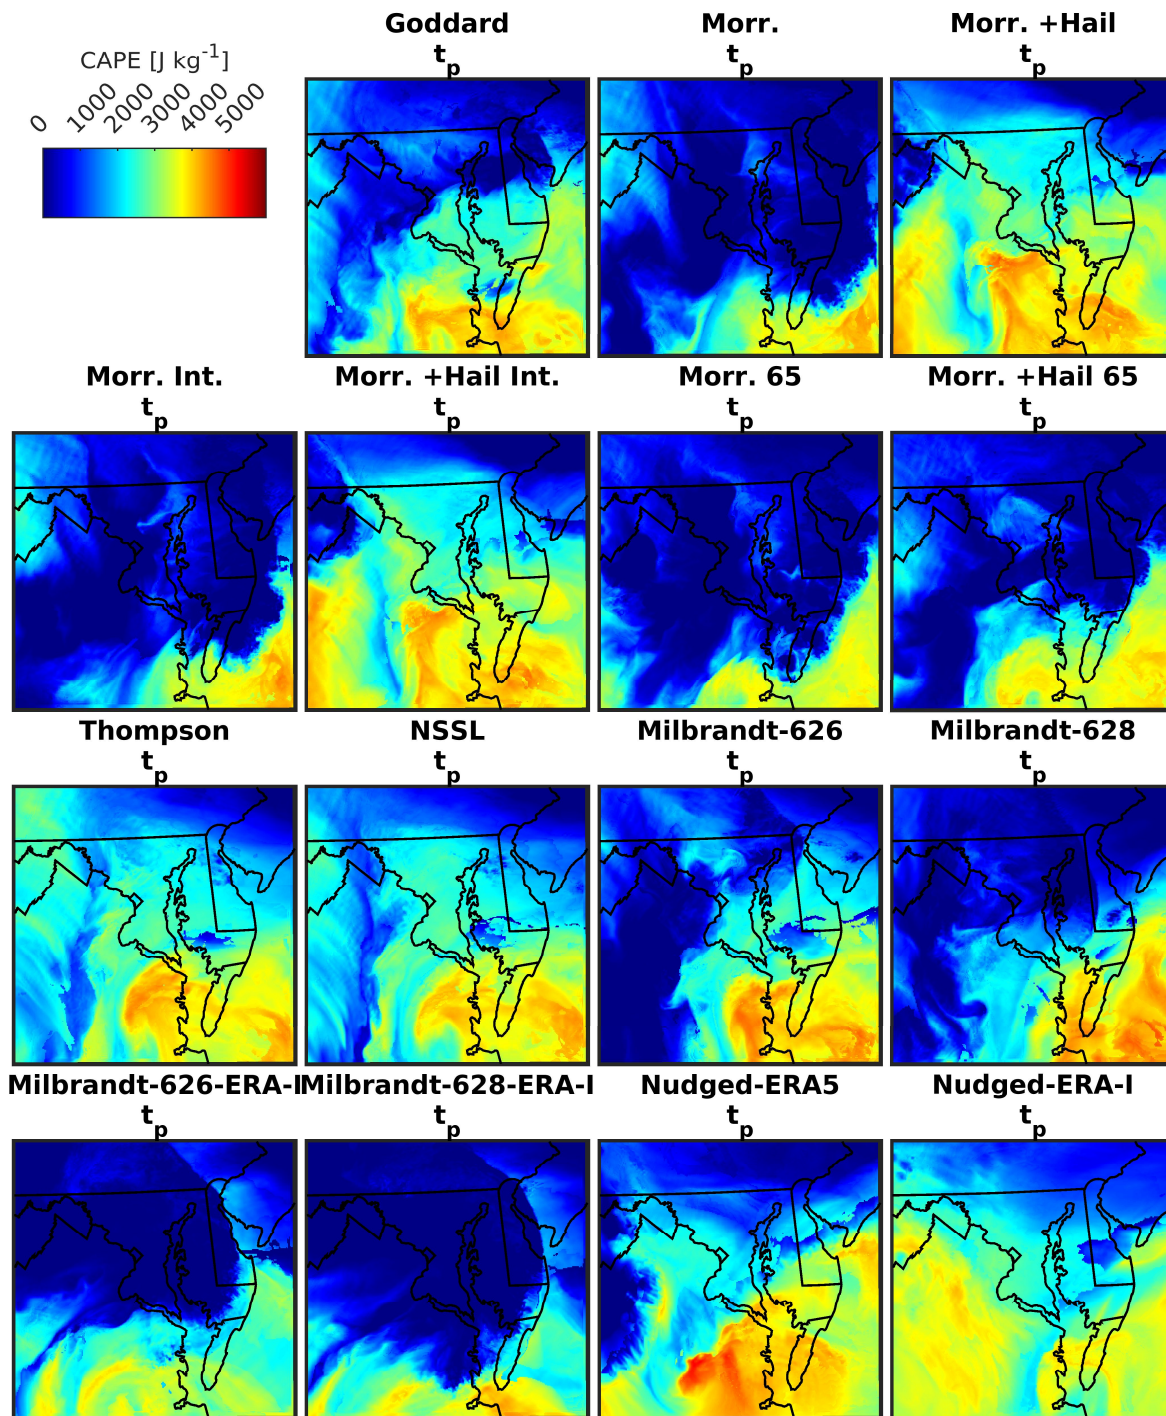

19  
 20 Figure S4: Spatial patterns of MU-CAPE at  $t_p$  (i.e. the time of peak spatial extent of cREF > 40 dBZ during the Derecho  
 21 period) over domain d03 for all ensemble members. These panels are also shown in Figure 13 of the main text but are  
 22 included again here, enlarged for visibility.

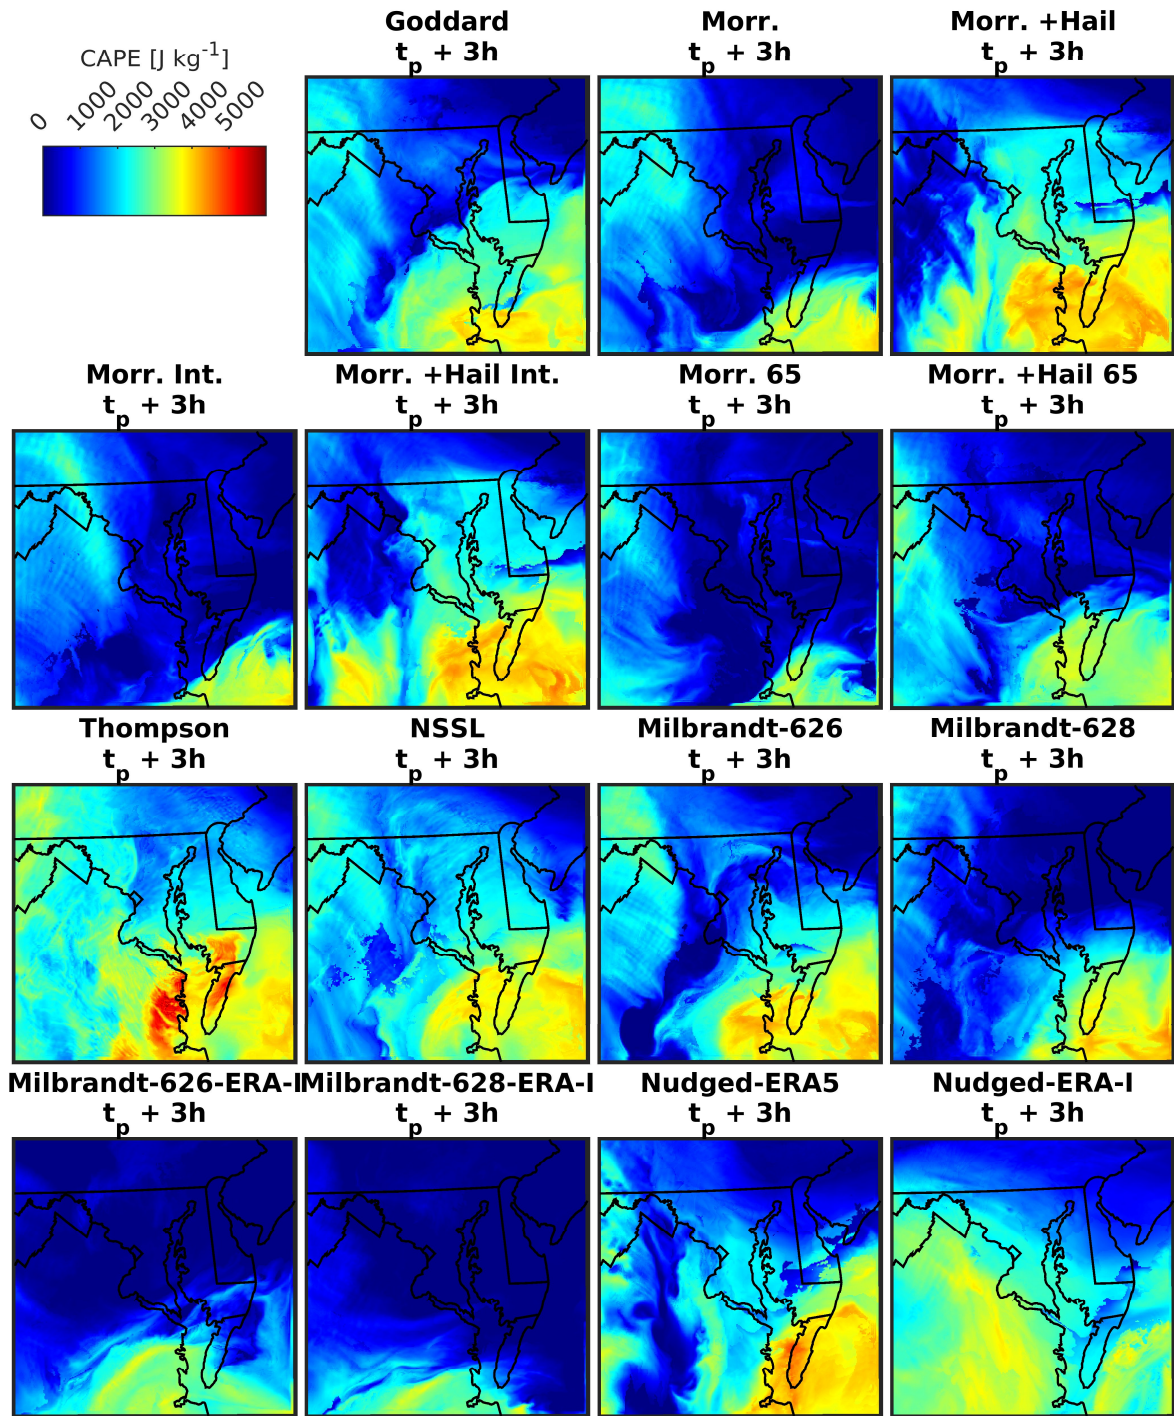

23

24 Figure S5: Spatial pattern of MU-CAPE at  $t_p + 3$  hours (i.e. 3 hours after the time of peak spatial extent of cREF > 40 dBZ  
 25 during the Derecho period) over domain d03 for all ensemble members. These panels are also shown in Figure 13 of the  
 26 main text but are included again here, enlarged for visibility.



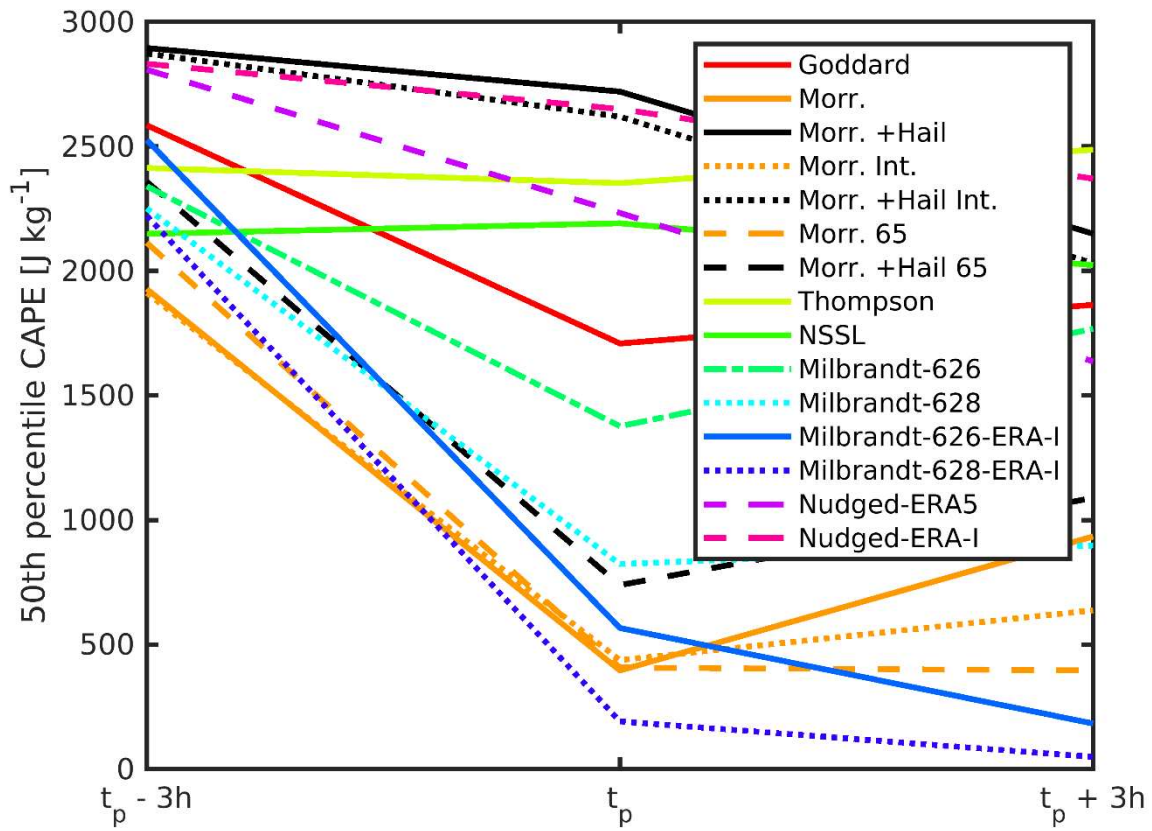

27

28 **Figure S6: The spatial average (median) MU-CAPE in domain d03 cells in the six hours surrounding  $t_p$  (the time of peak**  
 29 **spatial extent of cREF > 40 dBZ during the Derecho period) for each ensemble member.**

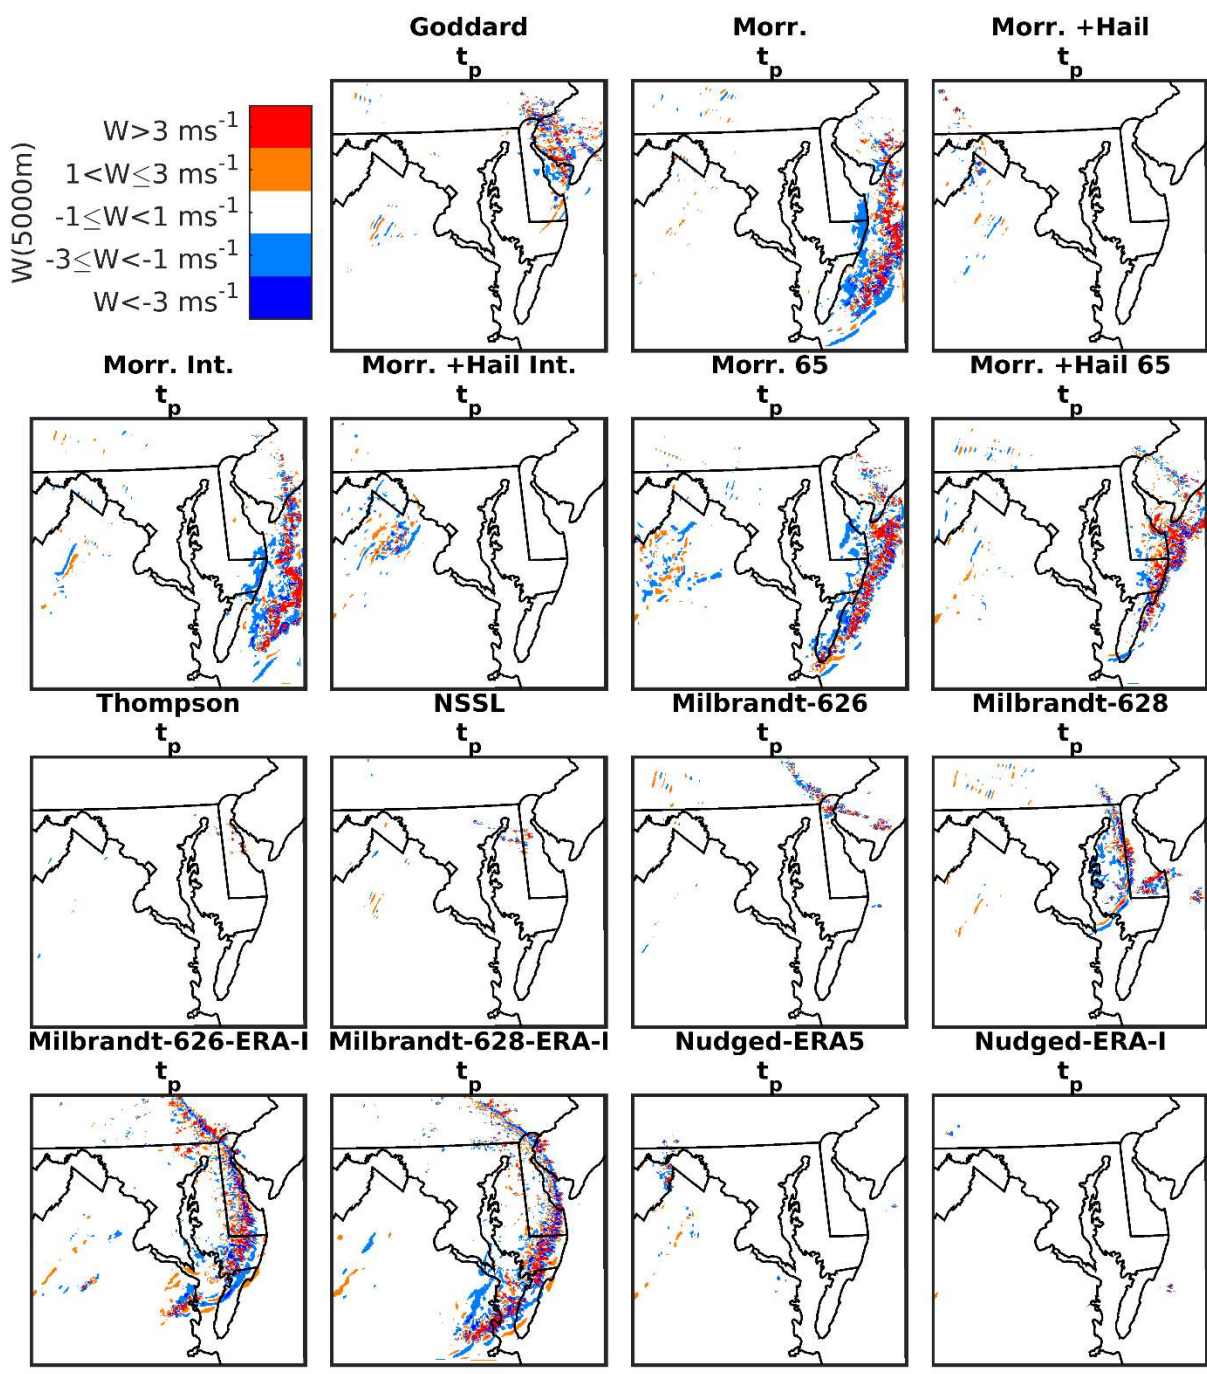

30  
 31 Figure S7: Vertical velocity ( $W$ ) at 5000 m and  $t_p$  (the time of peak spatial extent of cREF > 40 dBZ during the Derecho  
 32 period) for each ensemble member.  $|W| > 1 \text{ ms}^{-1}$  are shown in four colored classes. These vertical velocities are also shown  
 33 in Figure 13 of the main text but are included again here, enlarged for visibility.



```

34 Example namelist for the derecho simulations
35
36 &time_control
37   run_days           = 6,
38   run_hours          = 0,
39   run_minutes        = 0,
40   run_seconds        = 0,
41   start_year         = 2012, 2012, 2012,
42   start_month        = 06, 06, 06,
43   start_day          = 26, 26, 26,
44   start_hour         = 00, 00, 00,
45   start_minute       = 00, 00, 00,
46   start_second       = 00, 00, 00,
47   end_year           = 2012, 2012, 2012,
48   end_month          = 07, 07, 07,
49   end_day            = 02, 02, 02,
50   end_hour           = 00, 00, 00,
51   end_minute         = 00, 00, 00,
52   end_second         = 00, 00, 00,
53   interval_seconds   = 21600
54   input_from_file    = .true., .true., .true.,
55   history_interval    = 60, 10, 10,
56   frames_per_outfile = 1, 1, 1,
57   history_outname     = "/wrfout/wrfout_d<domain>_<date>"
58   restart             = .false.,
59   restart_interval    = 1440,
60   override_restart_timers = .true.,
61   io_form_history     = 11
62   io_form_restart     = 2
63   io_form_input       = 2
64   io_form_boundary    = 11
65   io_form_auxinput2   = 11
66   io_form_auxhist2    = 11
67   debug_level        = 10
68   nocolons            = .true.,
69   auxinput4_inname    = "wrflowinp_d<domain>",
70   auxinput4_interval  = 1440, 1440, 1440,
71   io_form_auxinput4   = 2,
72   auxinput1_inname    =
73   "/met_files/ERA5/met_em.d<domain>.<date>"
74   iofields_filename   = "my_file_d01.txt",
75   "my_file_d02.txt", "my_file_d03.txt",
76   ignore_iofields_warning = .true.,
77   auxhist1_outname    = "/aux1/auxhist1_d<domain>_<date>"
78   auxhist1_interval   = 60, 60, 60,
79   frames_per_auxhist1 = 1, 1, 1,
80   io_form_auxhist1    = 11,
81   output_diagnostics = 1,
82   auxhist3_outname    = "/wrfout/wrfxtrm_d<domain>_<date>"
83   auxhist3_interval   = 60, 10, 10,
84   frames_per_auxhist3 = 1, 1, 1,

```

```

85   io_form_auxhist3           = 11,
86   /
87
88   &domains
89   time_step                   = 30,
90   time_step_fract_num        = 0,
91   time_step_fract_den        = 1,
92   max_dom                     = 3,
93   e_we                        = 175,    262,    295,
94   e_sn                        = 175,    262,    295,
95   e_vert                      = 41,     41,     41,
96   p_top_requested             = 5000,
97   sfcp_to_sfcp                = .true.,
98   num_metgrid_levels          = 38,
99   num_metgrid_soil_levels     = 4,
100  dx                          = 12000, 4000, 1333.33,
101  dy                          = 12000, 4000, 1333.33,
102  grid_id                     = 1,     2,     3,
103  parent_id                   = 1,     1,     2,
104  i_parent_start              = 1,     60,    105,
105  j_parent_start              = 1,     35,    75,
106  parent_grid_ratio           = 1,     3,     3,
107  parent_time_step_ratio      = 1,     3,     3,
108  feedback                    = 0,
109  max_ts_locs                 = 0,
110  eta_levels                   = 1.0000 , 0.9958 , 0.9916 , 0.9874
111  , 0.9832 ,
112                               0.9790 , 0.9749 , 0.9707 , 0.9661
113  , 0.9609 ,
114                               0.9549 , 0.9480 , 0.9398 , 0.9303
115  , 0.9189 ,
116                               0.9054 , 0.8894 , 0.8704 , 0.8481
117  , 0.8221 ,
118                               0.7922 , 0.7583 , 0.7205 , 0.6791
119  , 0.6346 ,
120                               0.5877 , 0.5393 , 0.4900 , 0.4407
121  , 0.3922 ,
122                               0.3450 , 0.2996 , 0.2564 , 0.2156
123  , 0.1773 ,
124                               0.1417 , 0.1086 , 0.0755 , 0.0475
125  , 0.0224 ,
126                               0.0000,
127  /
128
129  &physics
130  mp_physics                   = 9,     9,     9,
131  ra_lw_physics                = 1,     1,     1,
132  ra_sw_physics                = 1,     1,     1,
133  radt                         = 10,    10,    10,
134  sf_sfclay_physics            = 1,     1,     1,
135  sf_surface_physics           = 2,     2,     2,
136  bl_pbl_physics               = 5,     5,     5,

```



```

137  bldt                = 0,      0,      0,
138  cu_physics          = 1,      0,      0,
139  cudt                = 5,
140  isfflx              = 1,
141  ifsnow              = 1,
142  icloud              = 1,
143  surface_input_source = 3,
144  num_soil_layers     = 4,
145  num_land_cat        = 21,
146  sf_urban_physics    = 0,      0,      0,
147  bl_mynn_tkebudget   = 1,      1,      1,
148  bl_mynn_tkeadvect   = .true., .true., .true.,
149  rdmaxalb            = .false.,
150  sst_update          = 1,
151  tmn_update          = 1,
152  usemonalb           = .true.,
153  lagday              = 150,
154  sst_skin            = 1,
155  slope_rad           = 1,  1,  1,
156  prec_acc_dt         = 60., 10., 10.,
157  fractional_seaice   = 1,
158  seaice_threshold    = 0.,
159  /
160
161  &noah_mp
162  dveg                = 4,
163  opt_crs              = 1,
164  opt_btr              = 2,
165  opt_run              = 3,
166  opt_sfc              = 1,
167  opt_frz              = 1,
168  opt_inf              = 1,
169  opt_rad              = 3,
170  opt_alb              = 2,
171  opt_snf              = 4,
172  opt_tbot             = 1,
173  opt_stc              = 3,
174  /
175
176  &dynamics
177  w_damping            = 1,
178  diff_opt             = 1,      1,      1,
179  km_opt               = 4,      4,      4,
180  diff_6th_opt         = 0,      0,      0,
181  diff_6th_factor      = 0.12,  0.12,  0.12,
182  base_temp            = 290.
183  damp_opt             = 0,
184  zdamp                = 5000., 5000., 5000.,
185  dampcoef             = 0.01,  0.01,  0.01,
186  khdif                = 0,      0,
187  kvdif                = 0,      0,
188  non_hydrostatic      = .true., .true., .true.,

```

```
189 /
190
191 &bdy_control
192 spec_bdy_width           = 5,
193 spec_zone                = 1,
194 relax_zone               = 4,
195 spec_exp                 = 0.13
196 specified                = .true., .false., .false.,
197 nested                   = .false., .true., .true.,
198 /
199
200 &grib2
201 /
202
203 &namelist_quilt
204 nio_tasks_per_group = 0,
205 nio_groups = 1,
206 /
207
```
